# Supplementary material for: Taxogenomic and Metabolic Insights into Marinobacterium ramblicola sp. nov., a New Slightly Halophilic Bacterium Isolated from Rambla Salada, Murcia
Source: MDPI journal article supplement (doi:10.3390/microorganisms9081654), 2021-08-03
Supplement: s1 [file s1]

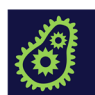

Supplementary Material

# Taxogenomic and Metabolic Insights *Marinobacterium ramblicola* sp. nov., a New Slightly Halophilic Bacterium Isolated from Rambla Salada, Murcia

Ana Durán-Viseras <sup>1,2\*</sup>, David J. Castro<sup>1,2</sup>, José Carlos Reina<sup>1,2</sup>, Victoria Béjar<sup>1,2</sup> and Fernando Martínez-Checa<sup>1,2\*</sup>

<sup>1</sup> Microbial Exopolysaccharide Research Group, Department of Microbiology, Pharmacy Faculty, Campus de Cartuja s.n., 18071 Granada, Spain; anaduran@us.es (A.D.-V.), castricoxpc@gmail.com (D.J.C.), josecreina@ugr.es (J.C.R.), vbejar@ugr.es (V.B.), fmcheca@ugr.es (F.M.-C.)

<sup>2</sup> Biomedical Research Center, Institute of Biotechnology, 18016 Granada, Spain

\* Correspondence: anaduran@us.es fmcheca@ugr.es

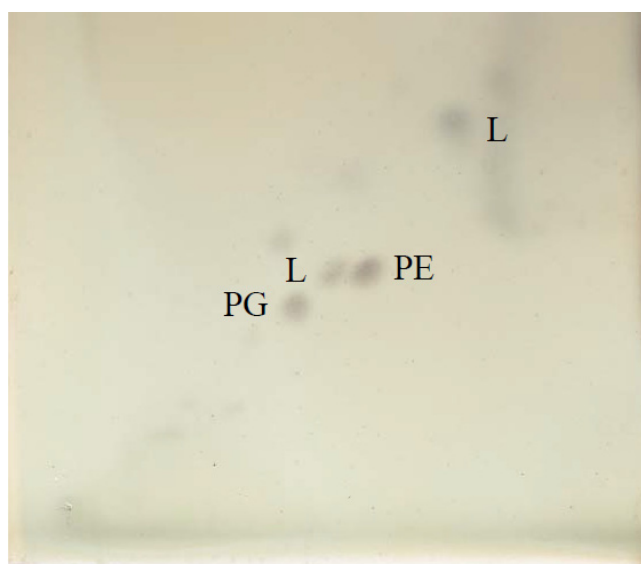

**Figure S1.** Two-dimensional TLC of polar lipids from strain D7<sup>T</sup>. **Abbreviations:** PE, phosphatidylethanolamine; PG, phosphatidylglycerol; L, lipid.

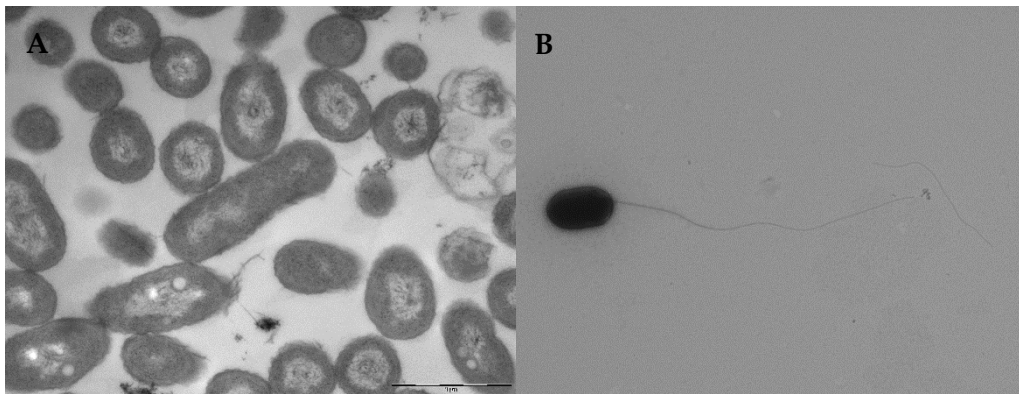

**Figure S2.** Electron micrographs of negatively stained preparation of cells of strain D7<sup>T</sup>. Cells were grown on MA plates at 32 °C for 24 h with shaking at 150 rpm and stained with % (w/v) uranyl acetate (Bar, 1 µm).

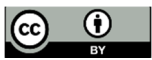

**Copyright:** © 2021 by the authors. Submitted for possible open access publication under the terms and conditions of the Creative Commons Attribution (CC BY) license (<http://creativecommons.org/licenses/by/4.0/>).
